# Supplementary material for: Prevalence of Spontaneous Bacterial Peritonitis (SBP) in Hepatitis B (HBV), and Hepatitis C (HCV) Liver Cirrhosis: A Systematic Review and Meta-Analysis
Source: MDPI journal article supplement (doi:10.3390/healthcare11020275), 2023-01-16
Supplement: s1 [file s1]

## SEARCH STRATEGY : SBP IN HEPATITIS BASED CIRRHOSIS

### SCOPUS

TITLE-ABS-KEY("Spontaneous bacterial peritonitis" OR "SBP") AND TITLE-ABS-KEY("hepatitis" OR "hepatitis B" OR "hepatitis C" ) AND TITLE-ABS-KEY(cirrhosis)

### GOOGLE SCHOLAR

allintitle: spontaneous bacterial peritonitis Cirrhosis "Hepatitis "

### SCIENCE DIRECT

("Spontaneous bacterial peritonitis" OR "SBP") AND ("hepatitis" OR "hepatitis B" OR "hepatitis C" ) AND (cirrhosis)

### PUB MED:

("spontaneous bacterial infection"[Title/Abstract] OR "SBP"[Title/Abstract] OR "Ascites"[Title/Abstract] OR (("ascetic"[All Fields] OR "ascetics"[All Fields]) AND "fluid infection"[Title/Abstract])) AND ("hepatitis"[Title/Abstract] OR "hepatitis b"[Title/Abstract] OR "hepatitis c"[Title/Abstract] OR "HBV"[Title/Abstract] OR "HCV"[Title/Abstract]) AND ("liver cirrhosis"[Title/Abstract] OR "cirrhosis"[Title/Abstract])
