# Supplementary material for: Prevalence of Spontaneous Bacterial Peritonitis (SBP) in Hepatitis B (HBV), and Hepatitis C (HCV) Liver Cirrhosis: A Systematic Review and Meta-Analysis
Source: MDPI journal article supplement (doi:10.3390/healthcare11020275), 2023-01-16
Supplement: s1 [file s1]

## QUALITY OF INCLUDED STUDIES BY JBI CRITICAL APPRAISAL CHECKLIST FOR STUDIES REPORTING PREVALENCE DATA

| S/N | Name of authors and year of publication |      | JBI checklist* |    |     |     |     |     |     |     |     | Total |
|-----|-----------------------------------------|------|----------------|----|-----|-----|-----|-----|-----|-----|-----|-------|
| 1   | Amelia et al.                           | 2018 | 1              | 2  | 3   | 4   | 5   | 6   | 7   | 8   | 9   |       |
| 2   | Rosalie et al.                          | 2017 | Yes            | No | Yes | 8     |
| 3   | Giovambattista et al.                   | 1983 | Yes            | No | Yes | 8     |
| 4   | Evangelos et al.                        | 2006 | Yes            | No | Yes | 8     |
| 5   | Seung et al., (a)                       | 2008 | Yes            | No | Yes | 8     |
| 6   | Seung et al., (b)                       | 2009 | Yes            | No | Yes | 8     |
| 7   | Luke et al.                             | 2003 | Yes            | No | Yes | 8     |
| 8   | Lubna et al.                            | 2008 | Yes            | No | Yes | 8     |
| 9   | Nhian-Zhi et al.                        | 2018 | Yes            | No | Yes | 8     |
| 10  | Trad et al.                             | 2019 | Yes            | No | Yes | 8     |

**JBI CHECKLIST\*** 1. Appropriate sampling frame to address target population, 2. Appropriate sampling way of study participants, 3. Adequate sample size, 4. Detail description of study participants and settings, 5. Data analysis with sufficient coverage of identified sample, 6. Use of valid methods to identify the condition, 7. Standard, reliable way of measurement of condition for all participants, 8. Availability of appropriate statistical analysis, 9. Adequate response rate and management of low response rate.

**Scores are coded as Yes=1 and No=0.**
